# Supplementary material
Source: PubMed Central journal article supplement (PMC3977302)
Supplement: 1316513111_pnas.201316513SI.pdf [file 1316513111_pnas.201316513SI.pdf]

# Supporting Information

Wilde et al. 10.1073/pnas.1316513111

## SI Methods

**Samples and the Archaeological Background.** Ancient DNA analyses were performed on 150 Eneolithic and Bronze Age individuals from 34 sites in the North Pontic steppe. The area under study stretches from southern Bulgaria across the present-day Republic of Moldova and Ukraine in the west of the Eurasian steppe belt up to the middle course of the Volga and the river Manych in the east. With the exception of several early Eneolithic graves all other burials were discovered in barrows, so-called *kurgans*. Fifty-eight percent of the samples were discarded in the course of the work because they did not yield any DNA (57 samples), were not preserved well enough to be reproduced sufficiently (26 samples), or were contaminated (4 samples). Samples from 63 individuals in 59 graves at 23 archaeological sites could be used in the population genetic analyses (Table S1). All samples were dated typologically and assigned to various cultures. In some cases radiocarbon dates were available to verify the relative dates by falling into the widely recognized time frames of the respective cultures.

The analyzed burials can be archaeologically attributed to the Eneolithic and the Early Bronze Age (in terms of the chronological terminology used in Eastern Europe). Whereas the latter can be dated across the entire fifth millennium B.P., the Eneolithic complexes scatter over a much broader time span. The oldest seem to be the graves from the flat necropolis near Smyadovo (1, 2). They are from the second half of the seventh millennium B.P. The Eneolithic burials from other sites could all be dated to the sixth millennium B.P. but were attributed to various archaeological cultures.

The youngest Eneolithic samples consisted of two individuals from the tumulus 8 burials near the village Mayaki. They already indicate the transition to the Bronze Age. Neither was radiocarbon-dated; instead, they were dated typologically. The ceramic inventory of both can be attributed to the Usatovo culture, the monuments of which are limited to the northwestern Pontic region. Archaeozoological data from two settlements suggest that at least in this particular area specialized sheep and goat stockbreeding was practiced, whereas in older horizons of Eneolithic settlements in adjacent regions no clear pattern of domesticated species was observed (3). A high percentage of wild animal bones is documented for the majority of settlements of the sixth millennium B.P. in the steppe.

The transition to Early Bronze Age took place around 5,100–5,000 B.P. and is characterized by burials of the Yamnaya (or Pit Grave) culture. In this time the practice of burying deceased in barrows was used predominantly, if not exclusively. The few archaeozoological data available from settlements of the Yamnaya culture suggest a change to specialized breeding of cattle, which continued as the most effective subsistence strategy in the northern Pontic region and other parts of the western Eurasian steppe belt for more than 2,000 y. Because only a few Yamnaya settlements have been discovered, a mobile form of pastoralism has been assumed (e.g., ref. 4). Twenty-eight of the samples analyzed here can be attributed to the Yamnaya culture and are disseminated from southern Bulgaria in the west over the entire steppe region north of the Black Sea; 11 of the 12 radiocarbon dates fall within the range of 5,000 and 4,500 calibrated years B.P. They confirm the typological classification of the samples as belonging to the Yamnaya culture. One sample from Pestchanka II was older than 5,000 y. It has been suggested to be the earliest Yamnaya grave in a burial mound erected on top of Eneolithic graves.

Between 4,700 and 4,500 B.P. early catacomb graves appeared in southern Russia and eastern Ukraine during the younger phase of the Yamnaya culture. By the middle of the fifth millennium the Yamnaya culture abandoned pit grave constructions in favor of building catacombs. This change stretched across the entire steppe region between the Volga in the East and the Carpathian mountains and the lower Danube in the West. Our sample includes 25 skeletons from the Catacomb culture, 10 of which fall into the early phase between 4,700 and 4,500 B.P. The others were assigned to the late/developed Catacomb culture dated between 4,500 and 4,000 BP. Ten radiocarbon dates confirmed the typological classification of the samples. As already mentioned, changes in grave construction and burial rites can be observed, but the subsistence strategy of the Yamnaya culture seems to be continued by the Catacomb culture (3, 5).

## Anticontamination Measures, Sample Preparation, and Ancient DNA

**Extraction.** Ancient DNA analyses were carried out using the facilities of the Institute of Anthropology in Mainz, Germany. Strict anticontamination measures and precautions were taken as previously described (6, 7). Additionally to the pre- and post-PCR laboratories a clean room was set up in a third building. It was used exclusively for the bar coding (tagging) of multiplex PCR products in preparation for 454 sequencing. Between visiting the general post-PCR area and entering the clean room technicians showered and donned freshly laundered clothes. Workspace and equipment in this laboratory were cleaned each workday with bleach or DNA ExitusPlus IF (AppliChem).

Sample preparation and DNA extraction followed the procedures described in Bramanti et al. (6), except that 50-kDA Amicon Ultra-15 Centrifugal Filter Units (Millipore) were used to desalt and concentrate the DNA in the final step, following phenol–chloroform extraction. From all but two samples two independent extracts were obtained. With PES7 one extraction failed, and there was not enough sample material of OLE7 for a second extraction.

**mtDNA Amplification.** Four hundred three base pairs of the hypervariable region I (np 16,011–16,413) were amplified using seven overlapping primer pairs (Table S4). They were integrated in a triple multiplex setup that included 32 clade-determining coding region SNPs and a 9-bp-indel (Table S5), as well as used in single-locus PCRs. The multiplex reaction was set up in a final volume of 50–70  $\mu$ L, containing 1 $\times$  Multiplex Master Mix (Qiagen), 0.05  $\mu$ M each primer (Biospring) (12–13 pairs per setup), 0.4  $\mu$ g/ $\mu$ L BSA (Roche), 6–8  $\mu$ L DNA extract, and UV-irradiated HPLC water (Acros Organics/Fisher Scientific). Amplification was performed in a Mastercycler (Eppendorf) under the following conditions: initial denaturation at 95  $^{\circ}$ C for 15 min, 39–41 cycles of 30 s at 95  $^{\circ}$ C, 90 s at 56  $^{\circ}$ C, and 90 s at 72  $^{\circ}$ C, followed by a final elongation at 72 $^{\circ}$  for 10 min.

The setup for the 50- $\mu$ L single-locus amplification consisted of 1 $\times$  PCR Gold Buffer, 2.5 mM MgCl<sub>2</sub>, 2.5 U AmpliTaq Gold (Applied Biosystems), 0.2 mM dNTP mix (Qiagen), 0.1–0.2  $\mu$ M each primer (Biospring), 0.4  $\mu$ g/ $\mu$ L BSA (Roche), 3–8  $\mu$ L DNA extract, and UV-irradiated HPLC water (Acros Organics). The PCR cycle program started with an initial denaturation of 3–6 min at 94  $^{\circ}$ C, followed by 39–41 cycles of 35 s at 94  $^{\circ}$ C, 35 s at 56  $^{\circ}$ C, 35 s at 72  $^{\circ}$ C, and a final elongation at 72  $^{\circ}$ C for 10 min. Besides the seven primer pairs from the multiplex, well-preserved samples were alternatively amplified with just four overlapping primer systems

(Table S4). PCR conditions were the same except that the annealing temperature was 58 °C.

**Nuclear DNA Amplification.** The primer systems to genotype rs12913832, rs16891982, and rs1042602 were designed with the software Primer Select (DNASTAR Lasergene 8) (Table S4). They were part of a multiplex PCR setup amplifying up to 23 nuclear loci. PCR reactions were carried out in a final volume of 80–100  $\mu$ L, containing 1.5 $\times$  PCR Gold Buffer, 6.25 mM MgCl<sub>2</sub>, 8 U AmpliTaq Gold (Applied Biosystems), 0.4 mM dNTP mix (Qiagen), 0.025  $\mu$ M each primer (Biospring), 0.6  $\mu$ g/ $\mu$ L BSA (Roche), 10–18  $\mu$ L DNA extract, and UV-irradiated HPLC water (Acros Organics). The amplification was performed in a Mastercycler gradient (Eppendorf) under the following conditions: initial denaturation at 94 °C for 3–6 min, 45–50 cycles of 40 s at each 94 °C, 58 °C, and 72 °C, and final elongation at 72 °C for 10 min.

In case the authentication scheme (discussed below) could not be fulfilled by multiplex PCRs, individual loci were amplified via single-locus PCRs. Those were each set up in a total volume of 50  $\mu$ L, with 1 $\times$  PCR Gold Buffer, 2.5 mM MgCl<sub>2</sub>, 2.5 U AmpliTaq Gold (Applied Biosystems), 0.2 mM dNTP mix (Qiagen), 0.2  $\mu$ M each primer (Biospring), 0.4  $\mu$ g/ $\mu$ L BSA (Roche), 3–5  $\mu$ L DNA extract, and UV-irradiated HPLC water (Acros Organics). The PCR cycle program started with an initial denaturation of 3 min at 94 °C, followed by 48 cycles of 35 s at 94 °C, 35 s at 58 °C, 35 s at 72 °C, and a final elongation at 72 °C for 10 min.

The same nuclear loci were investigated in 60 anonymous modern Ukrainians (8). DNA extracts obtained from buccal mucosa were analyzed in the same multiplex PCR as the ancient samples. The PCRs were set up with 1.5 $\times$  PCR Gold Buffer, 7.5 mM MgCl<sub>2</sub>, 5 U AmpliTaq Gold (Applied Biosystems), 0.4 mM dNTP mix (Qiagen), 0.02  $\mu$ M each primer (Biospring), 0.2  $\mu$ g/ $\mu$ L BSA (Roche), 2  $\mu$ L DNA extract, and HPLC water (Acros Organics) up to a final volume of 50  $\mu$ L. PCR was performed by initial denaturation for 6 min at 94 °C, 33 cycles of 40 s at each 94 °C, 58 °C, and 72 °C, and a final elongation at 72 °C for 10 min. For all PCRs amplification success was determined by agarose gel electrophoresis.

**The 454 Sequencing.** Multiplex PCR products were tagged and pooled according to a protocol modified after Meyer et al. (9). The MinElute PCR Purification Kit (Qiagen) was used for the purification steps. The attempt to achieve equimolarity was abandoned because, particularly when working with ancient DNA, (i) despite optimization of the setup, it is highly unlikely that loci within a multiplex reaction are amplified equally well, and (ii) bacterial DNA and primer dimers can distort DNA quantification results.

Up to 60 mitochondrial and 60 nuclear PCR products were pooled using 60 8-nt barcodes with at least three pairwise nucleotide differences (9); 454 sequencing was carried out externally by GATC Biotech AG.

During the course of the experiments the two final steps of the original protocol, dephosphorylation and restriction digestion, were omitted. Their purpose is to exclude molecules from the 454 sequencing that carry no or only one barcode. For this measure to take effect the “end polishing” in the 454 library preparation has to be skipped and the workflow has to start directly with the adapter ligation. Because the workflow at GATC Biotech AG routinely includes “end polishing,” completing the last two steps of original tagging protocol would have been obsolete and would have led to the loss of molecules that were tagged only one-sidedly.

**Direct Sequencing.** Single-locus PCR products were purified by enzymatic digestion with 2 U Exonuclease I (Fermentas/Thermo Scientific) and either 0.3 U Shrimp Alkaline Phosphatase (Fermentas)

or 0.3 U FastAP Thermosensitive Alkaline Phosphatase (Thermo Scientific). Treatment consisted of incubation at 37 °C for 45 min (with Shrimp Alkaline Phosphatase) or 30 min (with FastAP), followed by inactivation at 85 °C for 15 min.

The BigDye Terminator v1.1 Cycle Sequencing Kit (Applied Biosystems) was used for sequencing. A 10- $\mu$ L setup contained 0.75 $\times$  BigDye Terminator 5 $\times$  Sequencing Buffer (Applied Biosystems), 0.25 $\times$  BigDye Terminator v1.1 Ready Reaction Mix (Applied Biosystems), 1  $\mu$ M primer (Biospring), 1–4  $\mu$ L PCR product (volume depending on band strength on agarose gel), and HPLC water (Acros Organics). Sequencing took 25 cycles of 30 s at 92 °C, 15 s at 56–58 °C, and 2.5 min at 60 °C in a Mastercycler gradient (Eppendorf).

DNA sequences were obtained by capillary electrophoresis on an ABI PRISM 3130 Genetic Analyzer (Applied Biosystems) using POP-6 polymer (Applied Biosystems).

**Sequencing Analyses.** The 454 raw data were first sorted by barcode and primer sequences of the multiplex PCRs using a perl script “sort3” written by B. Rieger. The program requires the 454 sequences file (\*.fna), a barcode, and a primer file in \*.txt format. Because 454 sequencing has high error rates in homopolymer regions the program optionally collapses those stretches to single nucleotides in all three files before searching for matches. The user determines how far into a 454 sequence the program will search for a tag or a primer. For each barcode and primer a separate output file is created that contains the sequences in \*.fasta format, from which the barcode has been removed. Trimming of primers is optional.

Sorted and trimmed 454 data and sequences obtained by conventional Sanger sequencing were analyzed using SeqMan Pro (DNASTAR Lasergene 8, 9, and 10).

Hypervariable region 1 (HVR1) haplotypes were established using a two-step consensus building procedure. For each 454 run a consensus sequence of each amplicon was obtained by a two-thirds majority rule, requiring a minimum of three reads. Products with less than three reads were not considered. The same majority rule applied to base calling in the Sanger sequencing products. At least three such sequences were produced per primer pair from independent PCRs from two extracts. The final HVR1 consensus from np 16,011–16,413 [numbering according to the revised Cambridge Reference Sequence (rCRS) (10)] was built using these overlapping fragments and trimmed to np 16,011–16,400 for comparison with modern datasets from the literature. If there were discrepancies among the sequences, additional PCRs were performed. A nucleotide at a variable position was regarded as confirmed once it was present at a ratio of 3:1 or higher. If this could not be achieved, the sample was excluded from the analysis. As an additional confirmation, coding region SNPs from the multiplex PCRs were inspected for agreement with the inferred haplogroup assignment (Table S2).

Unlike the mitochondrial loci the autosomal SNPs are independent of each other because they are located on different chromosomes. That and diploidy make it harder to distinguish between authentic variation and that caused by postmortem damage, PCR or sequencing artifacts, carryover or other kinds of contamination, allelic dropout, and unspecific amplification, for example owing to sequence similarities in gene families. Therefore, the authentication scheme required the respective SNPs to be genotyped at least four times from independent PCR products from two extracts. For each 454 run genotypes were established by counting reads carrying the respective allele at the position of the SNP. A threshold was set that an allele had to be represented by at least 10 reads within a 454 run to be regarded as an authentic product of the respective PCR. An individual was deemed homozygous if all four independently obtained genotypes were consistent. If one of the four PCR products showed both alleles (above the threshold), whereas the inconsistent allele is presented

by fewer reads than the one present in the other PCRs, at least two additional PCRs were required to give homozygous results, so that a ratio of at least 11:1 in favor of one allele was achieved. Assuming that none of the alleles is amplified preferentially, the probability of allelic dropout occurring in five out of six PCRs is extremely low, ~0.3%. A sample was considered heterozygous if each allele is present at least twice and obtained at least once from each extract. If none of the above-mentioned criteria was fulfilled the sample was excluded from the analysis of that locus.

**Validation of Ancient DNA Data.** Blank controls were processed during milling (hydroxyl apatite), extraction, and PCR steps. After a multiplex PCR with amplicons as short as 72 bp, it is often not possible to distinguish between contamination or long secondary structures of unused primers. Therefore, 80% of the negative controls showing even a shadow of a band were sequenced. Contamination rate was established by dividing the number of loci giving sequences (after extrapolating for the 20% that were not sequenced) through the total number of sequenced loci. The overall mitochondrial and autosomal contamination rates including all primer systems used in the multiplex and single-locus PCR were 4.45% and 2.42% respectively. If only nuclear loci showing at least 10 reads are considered, then contamination rate drops to 0.38%. Narrowed down to the three pigmentation SNPs, contamination rate ( $\geq 10$  reads) is 0.65%.

Within the mtDNA dataset contaminants in negative controls could be distinguished in almost all cases, carrying haplotypes that were not present in the ancient samples at all, or at least not in the samples that were processed in the same experimental setup. One extraction blank provided sequences of the A allele at the tyrosinase locus. All individuals that were processed in that extraction setup showed the C allele. Also, all samples amplified in the same PCR carried the C allele, except for RIL3, which showed the A allele. RIL3 was consistently heterozygous in three other PCRs, however. One PCR negative control contained tyrosinase C-allele sequences. Samples that gave the C allele in that PCR were consistently homozygous in a least three additional independent PCRs.

Consensus HVR1 sequences were successfully assembled from 60 of the 63 individuals (Table S1). With the exception of five nucleotide positions these were always based on at least three independent PCR products. The first base pair of the first HVR1 fragment, np 16,011, was only reproduced twice in eight and np 16,012 in five samples. In 25 individuals two or three base pairs from np 16,272–16,274 were also only covered twice. No variation was observed at those nucleotide positions.

From three samples a consensus haplotype could not be obtained. Therefore, they were excluded from analyses and simulations that were based on mitochondrial DNA: OVI3 was successfully genotyped at the *HERC2* and the tyrosinase locus. For methodological reasons most samples were genotyped before the mtDNA was investigated. Preservation of OVI3 was not good to begin with and deteriorated, most likely owing to repeated thawing and freezing. The sample showed a U5 type but because this is based on only one or two PCRs OVI3 was not included in the mitochondrial analysis. KAL2 showed a systematic contamination in the mitochondrial DNA. Three positions in the HVR1 (16224Y, 16258R, and 16311Y) were ambiguous, indicating an H and a K type. Whereas both types were present in the coding region (not presented here) as well, there the H type dominated strongly. The only genotype that could be recovered from this sample was from the *HERC2* locus. Because KAL2 was clearly homozygous and the contamination risk for nuclear DNA is lower than for mtDNA, the allele is in all likelihood authentic. TEM8 shows a U5 type. Whereas positions 16189C, 16256T, and 16270T were confirmed, the status of 16192, 16193.1, and 16234 could not be positively identified. 16192 is part of a C stretch and besides the transition there might

also be an insertion. Whether this was caused by polymerase slippage or is an authentic polymorphism remains unclear.

Nuclear data were obtained from 48 of the 63 individuals (Table S1). For rs12913832 (*HERC2*) one sample, PES7, could not fulfill the above-mentioned authentication rules and a genotype could not be provided. Only one extract was available, and it was heterozygous in two PCRs and homozygous for the A allele in four other PCRs. At rs1042602 (*TYR*), two samples, KAL2 and VIN5, were excluded from further analysis. Only three inconsistent PCR products were available from KAL2, and none from VIN5. *SLC45A2* was prone to locus dropout in the multiplex PCR. Because of the rigorous authentication rule of a minimum of 10 reads per allele, more than two thirds of the sequencing results had to be rejected. By single-locus PCR in combination with Sanger sequencing, four consistent results from independent PCRs could be obtained for 22 individuals.

## Modeling Methods

**Population Continuity Test.** To test for population continuity in the region encompassing Bulgaria, Romania, Ukraine, and the southwest of the Russian Federation from the Neolithic until the present we first calculated the molecular  $F_{ST}$  (11) between a combined sample of 246 modern mtDNA HVR1 sequences comprising 30 Bulgarians (12), 18 Ukrainians (13), 198 southwest Russians (14), and a combined sample of the 60 homologous sequences from prehistoric remains generated in this study. The prehistoric samples are from across the same geographic region and dated from ca. 7,500 y B.P. to circa 3,700 y B.P. (31  $^{14}\text{C}$ -dated samples with an average SD of 56 y and 29 typologically dated samples with an average date range of 479 y). The region of overlap for all ancient and modern HVR1 samples was 390 bp, from 16,011–16,400 on the rCRS (10).

The  $F_{ST}$  between the ancient and modern sequence samples ( $F_{ST} = 0.00551$ ) was calculated using the *amova* function in the R (15) library *ade4* (16) and a  $P$  value ( $P = 0.0663$ ) was estimated using 100,000 permutations of the data. We then examined whether this observed  $F_{ST}$  was greater than expected under a model of population continuity (6) using coalescent simulation for a range of combinations of female effective population sizes at the Upper Paleolithic transition in Europe ( $N_{UP}$ ) 45,000 y ago (17) and the start of the Neolithic in the region ( $N_N$ ) 7,000 y ago and assumed a generation time of 25 y. We assumed a modern female effective population size of 5,444,812 (1/10 of the modern female population size estimated for the region from which the modern mtDNA sequences were sampled, by amalgamating data from censuses ranging from 2000 to 2004, sourced from the Google public data repository and Wikipedia), and a pre-Upper Paleolithic transition African female effective population size of 5,000 (6). Ten thousand coalescent simulations were performed for each of all 10,000 combinations of 100 equally spaced values of  $N_{UP}$ , ranging from 10 to 5,000, and 100 equally spaced values of  $N_N$ , ranging from 1,000–100,000, using *Fastsimcoal* (18). In each of the 100 million simulations the simulated ancient sample was generated by sampling 60 sequences, each of a different date. Those dates were themselves generated by randomly sampling one date from the date distribution of each of the 60 ancient samples. For the 31  $^{14}\text{C}$ -dated ancient samples this first required calibration using the R library *Bchron* (19) and the *IntCal09* calibration curve (20) to generate 10,000 calendar date estimates for each [500,000 Markov chain Monte Carlo (MCMC) iterations, with every 45th retained; burn-in: 50,000]. Where multiple  $^{14}\text{C}$  dates were available for a single sample only 10,000 were randomly selected from the pooled MCMC calibration estimates. Similarly, we generated 10,000 date estimates for each typologically dated sample by random sampling under a uniform distribution bounded by the date range. Dates were then divided by 25 (years per generation) and rounded. Simulated  $F_{ST}$  values were calculated using the *Amova* function in the R (15) library

ade4 (16) and the proportion of simulated  $F_{ST}$  values equal to or greater than the observed  $F_{ST}$  were plotted for each combination of  $N_{UP}$  and  $N_N$ . All combinations of  $N_{UP}$  and  $N_N$  yielded  $P$  values  $>0.05$ .

**Rationale for Forward Simulations.** To test whether changes in *HERC2* rs12913832 G, *TYR* rs1042602 A, or *SLC45A2* rs16891982 G allele frequencies between ancient and modern sampling periods (Fig. S1; for genotype frequencies, see Table S3) can be explained by genetic drift, or if natural selection needs to be invoked, and to estimate the strength of natural selection where appropriate, we used a forward simulation approach. To reflect allele frequency uncertainty in the ancient sample we use the Beta distribution (with parameters  $n_p + 1$  and  $n_q + 1$ , where  $n_p$  and  $n_q$  were the number of ancestral and derived alleles observed in our ancient sample, respectively), which is the conjugate prior for the binomial distribution (e.g., a sample of alleles for a biallelic polymorphism). This allows us to generate random ancestral allele frequency draws from the possible frequency range, given the observed allele counts in the ancient sample, and an uninformative (flat) prior. Put another way, the Beta distribution estimates the probability distribution of true allele frequencies, given the observed allele counts in the ancient sample, and so reflects allele frequency uncertainty in the ancient sample. Following this we simulate the trajectory of allele frequencies through time considering genetic drift and natural selection. In each generation genetic drift is simulated by binomial sampling across generations, where the sample size is assumed to be the modeled population size in that generation, and the outcome

probability is taken from the allele frequency in the previous generation. In addition, in each generation we apply a standard selection equation to model the effects of different selection coefficients on allele frequency change. To accommodate allele frequency estimate uncertainty in the modern sample, in the final generation of each forward simulation, simulated modern sample allele frequencies were picked from a random binomial with  $N$  equal to the modern sample size (*HERC2*  $n = 86$ , *SLC45A2*  $n = 82$ , and *TYR*  $n = 98$ ). To measure the goodness of fit of simulated and observed allele frequencies in the modern sample we used the Eq.  $1 - 2 \times |0.5 - P|$ , where  $P$  is the proportion of simulated modern allele frequencies that are greater than that observed. This yielded a two-tailed empirical  $P$  value for the observed allele frequency change for each combination of the demographic and natural selection parameters considered (21) (Fig. 2 and Fig. S2).

Exponential population growth was modeled from a range of values of  $N_e$  at the time the ancient sample (50 equally spaced  $\log_{10}$  values between 1,000 and 100,000) to a modern  $N_e$  of 4,845,710 (1/10 of the census population size of Ukraine in 2001, the year that the modern Ukrainian sample was collected; [http://en.wikipedia.org/wiki/Demographics\\_of\\_Ukraine](http://en.wikipedia.org/wiki/Demographics_of_Ukraine)). The number of generations forward-simulated was drawn at random from a pool of 600,000 date estimates for the ancient samples, as reported above and in the main text, generated by pooling each set of 10,000 date estimates for all 60 ancient samples.

- Chokhadzhiev S, Venelinova S (2007) Arkheologicheskoprouchvane na praistoricheski nekropol v m. Gornomova Koriya kraj Smyadovo. *Arkheologicheski otkritiya i razkopki prez* 2007:100–101.
- Chokhadzhiev S, Venelinova S (2006) Arkheologicheski prouchvaniya na khalkolitniya nekropol v m. Gornomova Koriya kraj grad Smyadovo. *Arkheologicheski otkritiya i razkopki prez* 2006:65–70.
- Kaiser E (2010) Der Übergang zur Rinderzucht im nördlichen Schwarzmeerraum. *Godišnjak Centar za balkanološka ispitivanja* 39:23–34.
- Merpert NY (1974) *Drevneishie Skotovody Volzhsko-Uralskogo Mezhdurechya* (Nauka, Moscow).
- Rassamakin Y (1999) The Eneolithic of the Black Sea Steppe: Dynamics of cultural and economic development 4500–2300 BC. *Late Prehistoric Exploitation of the Eurasian Steppe* (McDonald Institute for Archaeological Research, Cambridge, UK), pp 59–182.
- Bramanti B, et al. (2009) Genetic discontinuity between local hunter-gatherers and central Europe's first farmers. *Science* 326(5949):137–140.
- Haak W, et al. (2005) Ancient DNA from the first European farmers in 7500-year-old Neolithic sites. *Science* 310(5750):1016–1018.
- Nadkarni NA, Weale ME, von Schantz M, Thomas MG (2005) Evolution of a length polymorphism in the human PER3 gene, a component of the circadian system. *J Biol Rhythms* 20(6):490–499.
- Meyer M, Stenzel U, Hofreiter M (2008) Parallel tagged sequencing on the 454 platform. *Nat Protoc* 3(2):267–278.
- Andrews RM, et al. (1999) Reanalysis and revision of the Cambridge reference sequence for human mitochondrial DNA. *Nat Genet* 23(2):147.
- Excoffier L, Smouse PE, Quattro JM (1992) Analysis of molecular variance inferred from metric distances among DNA haplotypes: Application to human mitochondrial DNA restriction data. *Genetics* 131(2):479–491.
- Calafell F, Underhill P, Tolun A, Angelicheva D, Kalaydjieva L (1996) From Asia to Europe: Mitochondrial DNA sequence variability in Bulgarians and Turks. *Ann Hum Genet* 60(Pt 1):35–49.
- Malyarchuk BA, Derenko MV (2001) Mitochondrial DNA variability in Russians and Ukrainians: Implication to the origin of the Eastern Slavs. *Ann Hum Genet* 65(Pt 1): 63–78.
- Malyarchuk BA, et al. (2002) Mitochondrial DNA variability in Poles and Russians. *Ann Hum Genet* 66(Pt 4):261–283.
- R Core Team (2012) *R: A Language and Environment for Statistical Computing* (R Foundation for Statistical Computing, Vienna).
- Dray S, Dufour AB (2007) The ade4 package: Implementing the duality diagram for ecologists. *J Stat Softw* 22(4):1–20.
- Powell A, Shennan S, Thomas MG (2009) Late Pleistocene demography and the appearance of modern human behavior. *Science* 324(5932):1298–1301.
- Excoffier L, Foll M (2011) fastsimcoal: A continuous-time coalescent simulator of genomic diversity under arbitrarily complex evolutionary scenarios. *Bioinformatics* 27(9):1332–1334.
- Haslett J, Parnell A (2008) A simple monotone process with application to radiocarbon-dated depth chronologies. *J. R. Stat. Soc. Series C. Appl Stat* 57(4): 399–418.
- Heaton TJ, Blackwell PG, Buck CE (2009) A Bayesian approach to the estimation of radiocarbon calibration curves: The IntCal09 methodology. *Radiocarbon* 51(4): 1151–1164.
- Voight BF, et al. (2005) Interrogating multiple aspects of variation in a full resequencing data set to infer human population size changes. *Proc Natl Acad Sci USA* 102(51):18508–18513.



**Table S1. Results of the genetic analysis of the ancient samples**

| Archaeological site  | Latitude | Longitude | Kurgan           | Grave | Archaeological date | Laboratory code | HVR1 haplotype (np 16,011–16,413) | rs1291 3832 | rs1689 1982 | rs1042 602 |
|----------------------|----------|-----------|------------------|-------|---------------------|-----------------|-----------------------------------|-------------|-------------|------------|
| Benkovski            | 42.41    | 25.90     | 2                | 2     | EBA-Yam             | BEN3            | 188T                              |             |             |            |
| Durankulak           | 43.69    | 28.53     | Flat grave       | 15    | Late ENL            | DUR1            | 114A 192T 256T 270T 294T          |             |             |            |
| Kalinovka I          | 53.83    | 51.29     | 1                | 4     | EBA-Yam             | KAL1            | 147G 172C 223T 248T 344T          | A/G         | C/C         | A/A        |
|                      |          |           | 1                | 6     | EBA-Yam             | KAL2            | 355T                              |             |             |            |
| Krasnorechensk       | 49.21    | 38.21     | 13               | 1     | EBA-Cat1            | KNO4            | n/a                               | G/G         |             |            |
| Lisichansk           | 48.91    | 38.44     | 1                | 2     | EBA-Cat1            | LIS1            | 356C                              | A/G         |             | C/C        |
|                      |          |           | 2                | 1     | EBA-Cat1            | LIS2            | 256T 270T 399G                    | A/A         |             | C/C        |
|                      |          |           | 3                | 2     | EBA-Cat1            | LIS3            | 356C                              | A/A         |             | C/C        |
| Mayaki               | 46.41    | 30.28     | 1                | 7     | EBA-Yam             | MAJ3            | 354T                              | A/G         | C/C         | C/C        |
|                      |          |           | 1                | 13    | EBA-Yam             | MAJ4            | 256T 270T 399G                    | A/A         |             | C/C        |
|                      |          |           | 1                | 15    | EBA-Yam             | MAJ5            | 192T 311C                         | A/A         |             | C/C        |
|                      |          |           | 8                | 2     | Late ENL            | MAJ8            | 136C 189C 223T 278T               | G/G         | C/C         | C/C        |
|                      |          |           | 8                | 4     | Late ENL            | MAJ9            | 126C 294T 296T 304C               |             |             |            |
| Molyukhov Bugor      | 49.13    | 32.46     | Flat grave       | 3     | Late ENL            | MOB1            | 223T 292T                         | A/A         | C/C         | C/C        |
|                      |          |           | Flat grave       | 4.2   | Late ENL            | MOB3            | 192T 256T 270T 399G               | A/A         |             | C/C        |
| Nevskoe              | 49.17    | 37.98     | 2                | 10.1  | EBA-Cat2            | NEV1            | 192T 256T 270T 399G               | A/A         | C/C         | C/C        |
|                      |          |           | 5                | 9     | EBA-Cat2            | NEV3            | 362C                              | A/A         |             | C/C        |
| Nikolaevka III       | 53.09    | 50.31     | 1                | 2     | EBA-Yam             | NIK1            | 126C 163G 186T 189C 294T          | A/A         |             | C/C        |
|                      |          |           | 5                | 1     | EBA-Yam             | NIK7            | rCRS                              | A/A         | C/G         | C/C        |
| Novozvanovka II      | 48.58    | 38.36     | 1                | 2     | EBA-Cat2            | NOZ1            | 356C                              | G/G         | C/G         | C/C        |
|                      |          |           | 1                | 3     | EBA-Cat2            | NOZ2            | 356C                              | G/G         |             | C/C        |
| Olennii              | 45.60    | 38.53     | 1                | 9     | EBA-Yam             | OLE1            | 126C 292T 294T                    | A/A         |             | C/C        |
|                      |          |           | 3                | 14a   | EBA-Yam             | OLE7            | 048A 069T 126C 193T               |             |             |            |
| Ovchartsii           | 42.20    | 26.07     | The Big Tumulus  | 10    | EBA-Yam             | OVI2            | 224C 290T 311C                    |             |             |            |
|                      |          |           | 2                | 1     | EBA-Yam             | OVI3            | n/a                               | A/G         |             | C/C        |
| Peschanyi            | 46.56    | 43.68     | 1                | 3     | EBA-Yam             | PEJ1            | 192T 256T 270T 399G               | A/A         |             | C/C        |
|                      |          |           | 1                | 4     | EBA-Cat2            | PEJ2            | 234T                              |             |             |            |
|                      |          |           | 2                | 3     | EBA-Cat2            | PEJ3            | 362C                              | A/A         |             | C/C        |
| Peschanyi V          |          |           | 2                | 3     | EBA-Cat2            | PEJ4            | 362C                              | A/A         |             | C/C        |
|                      |          |           | 2                | 3     | EBA-Cat2            | PEJ5            | 356C                              | A/A         | C/C         | C/C        |
| Pestchanka II        | 48.60    | 35.31     | 1                | 15    | EBA-Yam             | PES7            | 042A 209C                         |             | G/G         | C/C        |
| Podlesnyj            | 53.14    | 50.67     | 3                | 3     | EBA-Yam             | POD1            | 192T 223T 292T 325C               | A/G         | G/G         | C/C        |
|                      |          |           | 3                | 5     | EBA-Yam             | POD2            | 126C 292T 294T                    | A/A         | G/G         | C/C        |
| Popovo               | 42.20    | 26.73     | Golyamata Mogila | 29    | EBA-Yam             | POP1            | 126C 294T 296T 324C               | A/G         | C/G         | C/C        |
|                      |          |           | Golyamata Mogila | 36    | EBA-Yam             | POP3            | 051G 129C 362C                    | A/A         | G/G         | C/C        |
|                      |          |           | Golyamata Mogila | 37    | EBA-Yam             | POP4            | 256T 270T 399G                    | A/A         |             | C/C        |
| Riltsi               | 43.59    | 27.78     | 264              | 5     | EBA-Yam             | RIL3            | 192T 224C 311C                    | A/A         | G/G         | C/A        |
| Shakhta Stepnaya     | 48.38    | 36.37     | 3                | 3     | EBA-Cat1            | SAC2            | 069T 126C 193T                    | A/A         |             | C/C        |
| Smyadovo             | 43.05    | 27.00     | Flat grave       | 10    | Early ENL           | SMY3            | rCRS                              |             |             |            |
|                      |          |           | Flat grave       | 11b   | Early ENL           | SMY4            | 304C                              |             |             |            |
|                      |          |           | Flat grave       | 22    | Early ENL           | SMY9            | 261T                              | A/A         |             | C/C        |
|                      |          |           | Flat grave       | 24    | Early ENL           | SMY11           | 126C 153A 269G 294T 296T          |             |             |            |
| Kirovograd Sugokleya | 48.52    | 32.25     | Sugokleya        | 8     | EBA-Yam             | SUG2            | 129A 172C 223T 311C 391A          | A/A         | C/C         | C/C        |
|                      |          |           | Sugokleya        | 13    | EBA-Cat2            | SUG5            | 362C                              | A/A         |             | C/C        |
|                      |          |           | Sugokleya        | 16    | EBA-Yam             | SUG6            | 362C                              | A/A         | C/C         | C/C        |
|                      |          |           | Sugokleya        | 20    | EBA-Yam             | SUG7            | rCRS                              |             |             |            |
|                      |          |           | Sugokleya        | 24    | EBA-Yam             | SUG8            | rCRS                              |             |             |            |
| Temrta III           | 46.55    | 43.66     | 1                | 2     | EBA-Cat2            | TEM1            | 356C                              | A/A         |             | C/C        |
|                      |          |           | 1                | 4     | EBA-Cat1            | TEM2            | rCRS                              | A/A         | G/G         | C/C        |
|                      |          |           | 1                | 6     | EBA-Cat2            | TEM3            | 069T 126C 145A 172C 222T 261T     |             |             |            |
| Temrta V             | 46.55    | 43.66     | 1                | 2.1   | EBA-Cat1            | TEM4            | 256T 270T 399G                    | A/A         | C/G         | C/C        |
|                      |          |           | 1                | 2.2   | EBA-Cat1            | TEM5            | 311C                              | A/A         |             | C/C        |
|                      |          |           | 1                | 3.1   | EBA-Cat1            | TEM6            | 311C                              | A/A         |             | C/C        |
|                      |          |           | 1                | 3.2   | EBA-Cat1            | TEM7            | 356C                              | A/A         |             | C/C        |
|                      |          |           | 1                | 4.1   | EBA-Cat2            | TEM8            | n/a                               | A/G         |             | C/C        |









**Table S3. Relative genotype frequencies and exact Hardy–Weinberg equilibrium (HWE) testing for the three pigmentation SNPs and three SNPs in the *ABCB1* gene in the ancient and modern Ukrainian dataset**

| Population                | <i>N</i> | Genotype frequencies |            |            | HWE test, <i>P</i> value |
|---------------------------|----------|----------------------|------------|------------|--------------------------|
| <i>HERC2 rs12913832</i>   |          |                      |            |            |                          |
|                           |          | AA                   | AG         | GG         |                          |
| Ancient                   | 47       | 0.766 (36)           | 0.149 (7)  | 0.085 (4)  | 0.0084                   |
| Modern                    | 43       | 0.186 (8)            | 0.326 (14) | 0.488 (21) | 0.0543                   |
| <i>SLC45A2 rs16891982</i> |          |                      |            |            |                          |
|                           |          | CC                   | CG         | GG         |                          |
| Ancient                   | 22       | 0.409 (9)            | 0.318 (7)  | 0.273 (6)  | 0.0899                   |
| Modern                    | 41       | 0.000 (0)            | 0.146 (6)  | 0.854 (35) | 1.0000                   |
| <i>TYR rs1042602</i>      |          |                      |            |            |                          |
|                           |          | CC                   | CA         | AA         |                          |
| Ancient                   | 46       | 0.935 (43)           | 0.043 (2)  | 0.022 (1)  | 0.0656                   |
| Modern                    | 49       | 0.408 (20)           | 0.449 (22) | 0.143 (7)  | 0.4957                   |
| <i>ABCB1 rs1128503</i>    |          |                      |            |            |                          |
|                           |          | CC                   | CT         | TT         |                          |
| Ancient                   | 24       | 0.333 (8)            | 0.417 (10) | 0.250 (6)  | 0.3137                   |
| Modern                    | 44       | 0.205 (9)            | 0.568 (25) | 0.227 (10) | 0.8730                   |
| <i>ABCB1 rs2032582</i>    |          |                      |            |            |                          |
|                           |          | GG                   | GT         | TT         |                          |
| Ancient                   | 28       | 0.414 (12)           | 0.310 (9)  | 0.241 (7)  | 0.0668                   |
| Modern                    | 41       | 0.159 (7)            | 0.545 (24) | 0.227 (10) | 0.9162                   |
| <i>ABCB1 rs1045642</i>    |          |                      |            |            |                          |
|                           |          | CC                   | CT         | TT         |                          |
| Ancient                   | 31       | 0.161 (5)            | 0.355 (11) | 0.484 (15) | 0.1946                   |
| Modern                    | 48       | 0.125 (6)            | 0.500 (24) | 0.375 (18) | 0.7570                   |

The genotypes of the three SNPs in the *ABCB1* gene were established by a minimum of three PCR products from two independent extractions. *P* value is a one-tailed test for excess of homozygotes, using the HWExact function, as implemented in the R library HardyWeinberg (1). Numbers in parentheses are absolute number of observed genotypes. *N*, total number of genotyped individuals.

1. R Core Team (2012) *R: A Language and Environment for Statistical Computing* (R Foundation for Statistical Computing, Vienna).

**Table S4. Primer for the amplification of the mitochondrial HVR1 and genotyping of three pigmentation SNPs**

| Multiplex | Amplicon           | Primer | Primer sequence 5' > 3'               | Source |
|-----------|--------------------|--------|---------------------------------------|--------|
| MP-A      | HVR1-M31           | 16011U | AGC ACC CAA AGC TAA GAT TCT AAT TT    | M.U.   |
|           |                    | 16088L | GTG GCT GGC AGT AAT GTA CGA AAT AC    | M.U.   |
| MP-B      | HVR1-M32           | 16071U | GGG TAC CAC CCA AGT ATT GAC TCA       | M.U.   |
|           |                    | 16153L | TGA TGT GGA TTG GGT TTT TAT GTA CTA   | M.U.   |
| MP-C      | HVR1-M33           | 16119U | GTA CAT TAC TGC CAG CCA CCA TG        | M.U.   |
|           |                    | 16207L | TGA TAG TTG AGG GTT GAT TGC TGT AC    | M.U.   |
| MP-A      | HVR1-M34           | 16185U | TAC ATA AAA ACC CAA TCC ACA TCA AAA C | M.U.   |
|           |                    | 16271L | GGT GGG TAG GTT TGT TGG TAT CCT       | M.U.   |
| MP-B      | HVR1-M35           | 16233U | AGT ACA GCA ATC AAC CCT CAA CTA TC    | M.U.   |
|           |                    | 16305L | TGT ACG GTA AAT GGC TTT ATG TAC TAT G | M.U.   |
| MP-C      | HVR1-M36           | 16274U | AAA GCC ACC CCT CAC CCA CTA G         | M.U.   |
|           |                    | 16345L | TGG GGA CGA GAA GGG ATT TGA C         | M.U.   |
| MP-A      | HVR1-M37           | 16340U | ACA TAA AGC CAT TTA CCG TAC ATA GCA C | M.U.   |
|           |                    | 16413L | CAC TCT TGT GCG GGA TAT TGA TTT C     | M.U.   |
| —         | HVR1-I             | L15996 | CTC CAC CAT TAG CAC CCA AAG C         | 1      |
| —         | HVR1-II            | H16142 | ATG TAC TAC AGG TGG TCA AG            | 2      |
|           |                    | L16117 | TAC ATT ACT GCC AGC CAC CAT           | 3      |
| —         | HVR1-III           | H16233 | GCT TTG GAG TTG CAG TTG ATG TGT       | 3      |
|           |                    | L16209 | CCC CAT GCT TAC AAG CAA GT            | 4      |
| —         | HVR1-IV            | H16348 | ATG GGG ACG AGA AGG GAT TTG           | 3      |
|           |                    | L16287 | CAC TAG GAT ACC AAC AAA CC            | 4      |
| NP        | HERC2 rs12913832   | H16410 | GCG GGA TAT TGA TTT CAC GG            | 4      |
|           |                    | HER_U  | CCA AGA GGC GAG GCC AGT TTC A         | S.W.   |
| NP        | SLC45A2 rs16891982 | HER_L  | AAG CCT CGG CCC CTG ATG ATG           | S.W.   |
|           |                    | S45_U2 | AGA ATA AAG TGA GGA AAA CA            | S.W.   |
| NP        | TYR rs1042602      | S45_L2 | GAA AGA GGA GTC GAG GTT GGA           | S.W.   |
|           |                    | TYR_U  | TTT GTC TGG ATG CAT TAT TAT GTG TCA   | S.W.   |
|           |                    | TYR_L  | CTT CAT GGG CAA AAT CAA TGT CTC       | S.W.   |

The first column states in which multiplex-PCR setups the primers have been used. Primer names of the seven fragments amplifying the HVR1 (M31–M37) present the first base after the 3' end of the primer according to the rCRS (5). Primer names of the four overlapping systems (I–IV) indicate the last base of the 3' end of the primer. For primers for SNPs in the coding region see Table S5.

1. Endicott P, et al. (2003) The genetic origins of the Andaman Islanders. *Am J Hum Genet* 72(1):178–184.
2. Stone AC, Stoneking M (1998) mtDNA analysis of a prehistoric Oneota population: implications for the peopling of the New World. *Am J Hum Genet* 62(5):1153–1170.
3. Haak W, et al. (2005) Ancient DNA from the first European farmers in 7500-year-old Neolithic sites. *Science* 310(5750):1016–1018.
4. Handt O, Krings M, Ward RH, Pääbo S (1996) The retrieval of ancient human DNA sequences. *Am J Hum Genet* 59(2):368–376.
5. Andrews RM, et al. (1999) Reanalysis and revision of the Cambridge reference sequence for human mitochondrial DNA. *Nat Genet* 23(2):147.
